# Supplementary material for: Synthesis and Analgesic Potential of 4-[4–chloro-3- (trifluoromethyl)-phenyl]-4-piperidinol analogues Against Pain Model in Mice
Source: Research Square preprint supplement (doi:10.21203/rs.3.rs-766239/v1), 2021-08-05
Supplement: Supplementary file 1 [file 7dc6024efd3ca89dcff5e0f2.docx]

**Scheme-1**

**Scheme-2**

|  |  |
| --- | --- |
| GROUP A1 | GROUP A3 |
|  |  |
| GROUP A2 | GROUP B |

**Scheme-3:** Group A (A1-A3) and Group B of TFMP Derivatives
